# 1Automated curation of CNMF-E-extracted ROI spatial footprints and 2calcium traces using open-source AutoML tools

3Tran, LM<sup>1,2,3</sup>, Mocle AJ<sup>1,2</sup>, Ramsaran AI<sup>1,4</sup>, Jacob AD<sup>1,4</sup>, Frankland PW<sup>1,2,4,5,6</sup>, Josselyn SA<sup>1,2,4,5,7</sup>

4<sup>1</sup>Hospital for Sick Children, Neurosciences and Mental Health, Toronto, ON, Canada

5<sup>2</sup>Department of Physiology, University of Toronto, Toronto, ON, Canada

6<sup>3</sup>Postgraduate Affiliates Program, Vector Institute, Toronto, ON, Canada

7<sup>4</sup>Department of Psychology, University of Toronto, Toronto, ON, Canada

8<sup>5</sup>Institute of Medical Sciences, University of Toronto, Toronto, ON, Canada

9<sup>6</sup>Child & Brain Development Program, Canadian Institute for Advanced Research (CIFAR), Toronto, 10ON, Canada

11<sup>7</sup>Brain, Mind & Consciousness Program, Canadian Institute for Advanced Research (CIFAR),

12Toronto, ON, Canada

## 13\* Correspondence:

14Sheena Josselyn

15sheena.josselyn@sickkids.ca

16**Keywords: calcium imaging, open-source, machine learning, microendoscopy**

## 17Abstract

18In vivo 1-photon calcium imaging is an increasingly prevalent method in behavioural neuroscience.  
19Numerous analysis pipelines have been developed to improve the reliability and scalability of pre-  
20processing and ROI extraction for these large calcium imaging datasets. Despite these advancements  
21in pre-processing methods, manual curation of the extracted spatial footprints and calcium traces of  
22neurons remains important for quality control. Here, we propose an additional semi-automated  
23curation step for sorting spatial footprints and calcium traces from putative neurons extracted using  
24the popular CNMF-E algorithm. We used the automated machine learning tools TPOT and  
25AutoSklearn to generate classifiers to curate the extracted ROIs trained on a subset of human-labeled  
26data. AutoSklearn produced the best performing classifier, achieving an F1 score > 92% on the  
27ground truth test dataset. This automated approach is a useful strategy for filtering ROIs with  
28relatively few labeled data points, and can be easily added to pre-existing pipelines currently using  
29CNMF-E for ROI extraction.

## 301 Introduction

31Advances in one-photon (1p) miniaturized fluorescence microscopy in terms of utility, cost, and  
32ease-of-use have increased the accessibility and popularity of *in vivo* calcium imaging in freely  
33behaving rodents (Cai et al., 2016; Ghosh et al., 2011; Hamel et al., 2015; Jacob et al., 2018).  
34Consequently, researchers are able to track the activity of neuronal populations across days, weeks,  
35or even months (Gonzalez et al., 2019; Rubin et al., 2015). Concurrent with the growing usage of 1p  
36microendoscopy in neuroscience, there is an increasing demand for high-throughput software that  
37accurately and efficiently processes the very large raw calcium imaging datasets now being  
38produced. To address this challenge, a number of algorithms and analysis pipelines have been

39 developed to automate the extraction of cells and calcium activity traces across time in a robust  
40 manner—a necessary step for downstream analyses (Pnevmatikakis, 2019).

41

42 Motion correction, source extraction, and cell registration (across multiple recording sessions) are  
43 important steps in pre-processing raw 1p calcium imaging data. Source extraction, the task of  
44 identifying the locations and activity of neurons in the imaged field of view (FOV), is arguably the  
45 most challenging of these steps is arguably the most challenging of these steps, as evidenced by the  
46 number of different algorithms published with the aim of improving this critical step. Nevertheless,  
47 two main methods of source extraction have been widely adopted in the field: principal component  
48 analysis/independent component analysis (PCA/ICA) (Mukamel et al., 2009) and the more recent  
49 extended constrained non-negative matrix factorization for microendoscopic data (CNMF-E) (Zhou  
50 et al., 2018). CNMF-E explicitly models background signals present in 1p microendoscopic  
51 recordings, and, therefore results in more accurate signal detection from neurons compared to  
52 PCA/ICA (Zhou et al., 2018).

53

54 Our lab has successfully applied CNMF-E to recordings from our open-source Compact Head-  
55 mounted Endoscope (CHEndoscope) in order to identify neuron locations (or spatial footprints) and  
56 extract their calcium activity traces from freely-behaving mice performing different behavioural  
57 tasks. CNMF-E has proven to be a reliable tool across multiple imaging sessions and experimental  
58 paradigms conducted in the lab with minimal parameter tuning in our hands (Jacob et al., 2018).  
59 However, like PCA/ICA, CNMF-E may still produce some false-positives in the output of detected  
60 cells (i.e., non-neuronal spatial footprints or calcium traces), which can be filtered out of the final  
61 dataset manually. We initially found success in filtering CNMF-E-extracted spatial footprints and  
62 traces by adding a manual curation step that involved visual inspection of each ROI and calcium  
63 trace (previously described in (Jacob et al., 2018)). While this type of manual curation can reduce the  
64 number of false-positives in CNMF-E's output, visual inspection of potentially tens of thousands of  
65 extracted cells can be time-consuming, and this method is not free from human error. Here, we  
66 propose an automated machine learning (AutoML) approach built on top of the CNMF-E algorithm's  
67 outputs to filter out potential false-positives. We implemented a semi-automated classification tool to  
68 limit the amount of manual curation required during pre-processing, without completely removing  
69 the ability to fine-tune the process with human-labeled datasets.

70

71 The main outputs of CNMF-E's source extraction algorithm are: 1) the extracted calcium traces  
72 representing cellular activity, and, 2) the spatial footprint of putative neurons. As mentioned  
73 previously, manual curation of these outputs involves identifying both aberrant traces that do not  
74 have stable baseline fluorescence (Resendez et al., 2016), transient durations inconsistent with the  
75 expressed calcium indicator (e.g., GCAMP6f) (Badura et al., 2014), and/or spatial footprints that are  
76 not consistent with the shape and size of neurons in the brain region being recorded (Resendez et al.,  
77 2016). We trained and validated our classifiers on a dataset of 14 000 manually curated spatial  
78 footprints and traces output from CNMF-E. The final model chosen was then used to automate the  
79 curation of ROIs from other recording sessions. From the two AutoML libraries, we chose the best  
80 performing model to train on the full training set to evaluate on the test set. We find our model can  
81 accurately predict whether a cell would be included or excluded at a rate of 92%.

82The potential time savings of manually curating thousands of cells makes this approach a method  
83worth employing as part of a typical 1p calcium imaging pipeline. While our AutoML-based curation  
84pipeline was primarily developed to be used with CHEndoscope data, our model takes the output of  
85CNMF-E and as a result, allows this method to be readily applied to data acquired using other 1p  
86miniature endoscopes.

## 872 **Methods**

### 88**Dataset preparation and pre-processing**

89

90The dataset used for model training was acquired from multiple hippocampal CA1 recordings  
91captured across different mice and recording sessions using methods described in Jacob et al. 2018.  
92From these recordings, we used CNMF-E (Zhou et al., 2018) to extract spatial footprints and calcium  
93traces of 14 000 ROIs. We then manually reviewed and labeled these ROIs as neuronal (included for  
94further analysis) or artefact (excluded from analysis). The labels were generated by two human expert  
95raters that inspected the calcium transients and spatial footprints based on previously reported  
96criteria:

97 1. fast rise and slow decay of calcium transients with stable baseline fluorescence (Resendez et  
98 al., 2016).

99 2. calcium transient durations consistent with GCaMP6f (or appropriate GCaMP variant)  
100 (Badura, Sun, Giovannucci, Lynch, & Wang, 2014).

101 3. spatial footprints consistent with appropriate neuronal shape and size (Resendez et al., 2016).

102Interrater agreement for the dataset was 87% across the two raters on a subset of the data (1073  
103putative ROIs extracted from CNMF-E) (Figure 1).

104Spatial footprints consisted of the maximum projection of the identified cell from all frames in the  
105video. We found that location of the footprint in the FOV was not important in our labelling criteria  
106(compared to shape and size of footprint), we cropped the spatial footprints to remove empty space.  
107Each spatial footprint was reduced to an 80x80 pixel image centered on the peak intensity of the  
108footprint. Furthermore, recordings were of varying lengths, so all trace data was cropped at 500  
109frames (equivalent to 100s of recording at 5fps). The 2 dimensional footprints were reduced to a 1  
110dimensional vector (6400 pixels) and concatenated to the trace data.

111

112We aggregated the labeled ROIs into a dataset split into training and test sets, which comprised 80%  
113(~11 000 ROIs) and 20% (~3 000 ROIs) of the data, respectively.

114

### 115**Model optimization and selection**

116

117We used two automated machine learning (AutoML) methods, TPOT (Olson et al., 2016; Olson &  
118Moore, 2019) and AutoSklearn (Feurer et al., 2019) that are based on the popular Python machine  
119learning toolbox, scikit-learn (Pedregosa et al. 2011) to select optimal classification models. While  
120other AutoML tools exist that may outperform the ones we chose (Truong et al., 2019), TPOT and  
121AutoSklearn are both free open-source, and easy to use, making them accessible for labs to  
122incorporate into their existing analysis pipelines.

123

124The key advantage of AutoML tools such as TPOT and AutoSklearn is that they do the extensive  
125work of finding the best type(s) of data transformation and models to build a pipeline for classifying

126the input data, as well as the hyperparameters associated with these steps. TPOT is a tree-based  
127optimization tool that builds and optimizes machine learning pipelines using genetic programming  
128(Olson et al., 2016; Olson & Moore, 2019). TPOT generates pipelines of pre-processing steps and  
129classification models in order to maximize classification performance while prioritizing simpler  
130pipelines. AutoSklearn performs algorithm selection and hyperparameter tuning using Bayesian  
131optimization, meta-learning and ensemble construction (Feurer et al., 2019) and as a result, the final  
132classifier is an ensemble of many different model types and their associated hyperparameters. We  
133primarily used default TPOT and AutoSklearn parameters, with a max evaluation time for a single  
134pipeline of 10 minutes, and a total search time of 2 days.

135

136During training, we used 10-fold cross-validation using stratified folds that preserved the relative  
137proportions of “include” and “exclude” labels (i.e., during each run of training, 9 of 10 folds were  
138used for training, and the 10th fold was used to test the performance of the model). This process was  
139repeated for all 10 folds, resulting in an averaged performance metric for the data. We optimized the  
140models to maximize the F1 score, the harmonic average of precision and recall, where high precision  
141indicates a low false positive rate, and high recall indicates a low false negative rate. In our dataset, a  
142true positive is an extracted ROI that both the trained model and a “ground truth” human scorer  
143define as suitable to be included for further analysis (i.e., it satisfies the three selection criteria listed  
144above). A true negative is an extracted ROI that is excluded for further analysis by both the model  
145and our ground truth scoring.

### 1463 **Results**

147To determine the efficacy of an AutoML approach for classification of CNMF-E extracted ROIs, we  
148tested the ability of TPOT and AutoSklearn to build classifiers that can label the pre-processed spatial  
149footprints and calcium traces of putative ROIs. Both TPOT and AutoSklearn were trained on 11 000  
150labeled ROIs in the training set split into 10 folds for cross-validation, repeated 5 times. The best  
151models obtained during training were used to determine the F1 score on the test set. Table 1 reports  
152the performance of the best models obtained by TPOT and AutoSklearn across the training folds and  
153on the test set.

154Next we assessed the transferability of the best classifier pipelines identified by TPOT and  
155AutoSklearn using fewer samples. We used the top performing classifier pipelines and  
156hyperparameters chosen by TPOT and AutoSklearn and trained the initialized pipelines using  
157datasets of increasing ROI number. The training set size ranged from 150 to 10 000 ROIs. Using a  
158change point analysis algorithm (PELT, Killick et al. 2012), we determined that AutoSklearn and  
159TPOT classifiers approached a maximal F1 score with 719 and 1000 labeled ROIs, respectively  
160(Figure 2). The pipelines found using our much larger labeled dataset may be easily incorporated  
161into other pipelines with minimal computational effort to train and finetune on CNMF-E extracted  
162ROIs from other 1p experiments, using fewer labeled ROIs.

163To examine the classifier performance in terms of false positives and false negatives, we created  
164confusion matrices to visualize the rate of true positives, true negatives, false positives and false  
165negatives from the TPOT and AutoSklearn predictions compared to ground truth. We found that the  
166classifier built with Autosklearn (0.922 F1, Table 1) performs better in terms of both reducing false  
167positives and false negatives (Figure 3).

168

169 To further assess the nature of the classification errors, we looked at the class confidences or  
170 probabilities of the test set predictions from the trained TPOT and AutoSklearn models (Figure 4).  
171 Class probabilities indicate the classifier’s certainty (using confidence score for TPOT and class  
172 probability for AutoSklearn) that a sample belongs to a particular class label. We tested whether  
173 mislabeled ROIs were also those which the classifiers expressed less confidence in classifying. We  
174 examined the size of the difference between certainty scores (true positives versus false positives,  
175 true negatives versus false negatives) in TPOT and AutoSklearn using Cohen’s  $d$  (Cohen, 2013;  
176 Sawilowsky, 2009) (Table 2). The AutoSklearn classifier—which outperformed the TPOT classifier  
177 based on F1 scores— showed large differences in certainty scores when labeling ROIs as positive  
178 ( $d=1.36$ ) or negative ( $d=2.34$ ). By contrast, the TPOT classifier was relatively less confident on both  
179 types of classification (positive  $d=0.63$ , negative  $d=1.68$ ). In other words, the AutoSklearn classifier  
180 was more certain in applying labels to ROIs than was the TPOT classifier. This indicates that false  
181 negatives and false positives in the higher performing AutoSklearn classifier may arise from “edge-  
182 cases” ROIs in the dataset which the classifier was not as certain about the label. In contrast, the  
183 poorer performance of the TPOT classifier may simply be due to poor generalization on the test set.

184 To investigate the nature of the false positives and false negatives from the best TPOT and  
185 AutoSklearn models, we looked at the underlying spatial footprints and calcium traces for mislabeled  
186 ROIs from both AutoML tools (Figure 5). Representative examples of excluded ROIs from the  
187 ground truth dataset show that some cells may be excluded (i.e., true negatives) because of poor trace  
188 data and/or poor spatial footprints, which possibly represent non-neuronal imaging artefacts and/or  
189 ROIs representing areas of background fluorescence. While some false positives from AutoSklearn  
190 shared similar features with true negative ROIs, others were more ambiguous. Upon inspection, these  
191 ROIs sometimes were high-quality spatial footprints with poor-quality calcium traces, or vice-versa,  
192 or were composed of spatial footprints and calcium traces of true neuronal-origin mixed with  
193 additional non-neuronal noise. These examples represent “edge-cases” which may be difficult to  
194 judge even by a human rater.

## 1954 Discussion

196 Automated curation of ROIs provides a fast, accurate method for classifying neural data generated in  
197 1p calcium imaging experiments. We show that AutoML tools such as the open source TPOT and  
198 AutoSklearn packages provide an easy way to build effective classifiers for ROIs extracted from the  
199 widely used CNMF-E algorithm. Spatial footprints and calcium traces from CNMF-E can be used to  
200 train these models with minimal data preprocessing. Furthermore, it may be possible to apply the top  
201 performing classifiers generated from this work to other experimental datasets taken from different  
202 1p imaging setups, while requiring relatively few labeled samples. Other analyses pipelines such as  
203 MIN1PIPE (Lu et al. 2018) have been developed to improve source extraction by reducing false  
204 positive ROIs without increasing the rate of false negatives. However, given the more widespread  
205 adoption of CNMF-E, the approach described here prevents labs from having to adopt entirely new  
206 analysis pipelines. Our approach provides a balance between the need to manually review the output  
207 of CNMF-E ROIs to maximize the number of detected cells, while still allowing some further  
208 automation of the otherwise laborious curation process.

209 An AutoML approach to reviewing these traces may be useful for curating traces from labeled data  
210 of the extracted ROIs from CNMF-E and can be implemented on top of pre-existing analysis  
211 pipelines without much need to adapt the software. However, there are a number of limitations to this  
212 approach. Firstly, we emphasize the automated aspect of this machine learning classifier approach  
213 and little need for hand-tuning, but we recognize that the best models still make errors. Cases in  
214 which the best performing classifier generated by AutoSklearn failed to detect true positives or true



215negatives were further reviewed and were typically seen to be edge cases where it may be difficult  
216for a human reviewer to make a judgment. Similarly, we found that a second expert scorer looking at  
217the same data may not make the exact same judgments on such edge cases (having an interrater  
218reliability score of 87%). While the AutoML classifiers were trained on the data that had relatively  
219little preprocessing beyond cropping and downsampling, future work could address whether feature  
220engineering over the spatial footprints and trace data could further improve accuracy and reduce  
221training time for model selection and hyperparameter tuning. Better curation of a training dataset for  
222the models may help reduce ambiguous cases that make it difficult for a classifier to make accurate  
223predictions.

224In conclusion, we present here a demonstration and benchmark of an AutoML approach for curation  
225of CNMF-E extracted ROIs. The methods described here can provide a flexible, free open-source,  
226and easy-to incorporate curation step for other researchers using CNMF-E for source extraction of  
227their 1p datasets, while requiring few changes to their existing analysis pipelines.

## 2285     **References**

229Badura, A., Sun, X. R., Giovannucci, A., Lynch, L. A., & Wang, S. S.-H. (2014). Fast calcium sensor  
230proteins for monitoring neural activity. *Neurophotonics*, 1(2), 025008.

231Cai, D. J., Aharoni, D., Shuman, T., Shobe, J., Biane, J., Song, W., Wei, B., Veshkini, M., La-Vu,  
232M., Lou, J., Flores, S. E., Kim, I., Sano, Y., Zhou, M., Baumgaertel, K., Lavi, A., Kamata, M.,  
233Tuszynski, M., Mayford, M., ... Silva, A. J. (2016). A shared neural ensemble links distinct  
234contextual memories encoded close in time. In *Nature* (Vol. 534, Issue 7605, pp. 115–118).  
235<https://doi.org/10.1038/nature17955>

236Cohen, J. (2013). *Statistical Power Analysis for the Behavioral Sciences*.  
237<https://doi.org/10.4324/9780203771587>

238Feurer, M., Klein, A., Eggenberger, K., Springenberg, J. T., Blum, M., & Hutter, F. (2019). Auto-  
239sklearn: Efficient and Robust Automated Machine Learning. In *Automated Machine Learning* (pp.  
240113–134). [https://doi.org/10.1007/978-3-030-05318-5\\_6](https://doi.org/10.1007/978-3-030-05318-5_6)

241Ghosh, K. K., Burns, L. D., Cocker, E. D., Nimmerjahn, A., Ziv, Y., Gamal, A. E., & Schnitzer, M. J.  
242(2011). Miniaturized integration of a fluorescence microscope. *Nature Methods*, 8(10), 871–878.

243Gonzalez, W. G., Zhang, H., Harutyunyan, A., & Lois, C. (2019). Persistence of neuronal  
244representations through time and damage in the hippocampus. *Science*, 365(6455), 821–825.

245Hamel, E. J. O., Grewe, B. F., Parker, J. G., & Schnitzer, M. J. (2015). Cellular level brain imaging  
246in behaving mammals: an engineering approach. *Neuron*, 86(1), 140–159.

247Jacob, A. D., Ramsaran, A. I., Mocle, A. J., Tran, L. M., Yan, C., Frankland, P. W., & Josselyn, S. A.  
248(2018). A Compact Head-Mounted Endoscope for In Vivo Calcium Imaging in Freely Behaving  
249Mice. *Current Protocols in Neuroscience / Editorial Board, Jacqueline N. Crawley ... [et Al.]*, 84(1),  
250e51.

251Mukamel, E. A., Nimmerjahn, A., & Schnitzer, M. J. (2009). Automated analysis of cellular signals  
252from large-scale calcium imaging data. *Neuron*, 63(6), 747–760.

253Olson, R. S., Bartley, N., Urbanowicz, R. J., & Moore, J. H. (2016). Evaluation of a Tree-based  
254Pipeline Optimization Tool for Automating Data Science. In Proceedings of the 2016 on Genetic and  
255Evolutionary Computation Conference - GECCO '16. <https://doi.org/10.1145/2908812.2908918>

256Olson, R. S., & Moore, J. H. (2019). TPOT: A Tree-Based Pipeline Optimization Tool for  
257Automating Machine Learning. In Automated Machine Learning (pp. 151–160).  
258[https://doi.org/10.1007/978-3-030-05318-5\\_8](https://doi.org/10.1007/978-3-030-05318-5_8)

259Pnevmatikakis, E. A. (2019). Analysis pipelines for calcium imaging data. In Current Opinion in  
260Neurobiology (Vol. 55, pp. 15–21). <https://doi.org/10.1016/j.conb.2018.11.004>

261Resendez, S. L., Jennings, J. H., Ung, R. L., Namboodiri, V. M. K., Zhou, Z. C., Otis, J. M., Nomura,  
262H., McHenry, J. A., Kosyk, O., & Stuber, G. D. (2016). Visualization of cortical, subcortical and  
263deep brain neural circuit dynamics during naturalistic mammalian behavior with head-mounted  
264microscopes and chronically implanted lenses. Nature Protocols, 11(3), 566–597.

265Rubin, A., Geva, N., Sheintuch, L., & Ziv, Y. (2015). Hippocampal ensemble dynamics timestamp  
266events in long-term memory. eLife, 4. <https://doi.org/10.7554/eLife.12247>

267Sawilowsky, S. S. (2009). New Effect Size Rules of Thumb. In Journal of Modern Applied Statistical  
268Methods (Vol. 8, Issue 2, pp. 597–599). <https://doi.org/10.22237/jmasm/1257035100>

269Truong, A., Walters, A., Goodsitt, J., Hines, K., Bayan Bruss, C., & Farivar, R. (2019). Towards  
270Automated Machine Learning: Evaluation and Comparison of AutoML Approaches and Tools. In  
2712019 IEEE 31st International Conference on Tools with Artificial Intelligence (ICTAI).  
272<https://doi.org/10.1109/ictai.2019.00209>

273Zhou, P., Resendez, S. L., Rodriguez-Romaguera, J., Jimenez, J. C., Neufeld, S. Q., Giovannucci, A.,  
274Friedrich, J., Pnevmatikakis, E. A., Stuber, G. D., Hen, R., Kheirbek, M. A., Sabatini, B. L., Kass, R.  
275E., & Paninski, L. (2018). Efficient and accurate extraction of in vivo calcium signals from  
276microendoscopic video data. eLife, 7. <https://doi.org/10.7554/eLife.28728>

## 2776 **Conflict of Interest**

278*The authors declare that the research was conducted in the absence of any commercial or financial*  
279*relationships that could be construed as a potential conflict of interest.*

## 2807 **Author Contributions**

281LT, PF, SJ contributed to the study design. AJ designed and constructed the CHEndoscopes. AR and  
282AM conducted surgeries, behavior experiments, CNMF-E processing, and manual ROI labelling. LT  
283performed all analyses using automated machine learning pipelines. LT, AM, AR, AJ performed the  
284statistical analyses and wrote the paper. All authors discusses and commented on the manuscript.

## 2858 **Funding**

286This work was supported by grants from the Canadian Institutes of Health Research (CIHR, grant  
287numbers FDN-388455 to SJ, FDN143227 to PF), Natural Science and Engineering Council of  
288Canada (NSERCs to SJ and PF), CIFAR catalyst award (SJ, PF) and an NIH (NIMH, 1 R01  
289MH119421-01) (SJ, PF). LT was supported by a SickKids Research Training Centre Restructuring  
290Fellowship, Natural Science and Engineering Council of Canada Scholarship (NSERC, PGSD), AM

291 by an NSERC CGSD, AR by an NSERC CGSD and NIH (NIMH, 1 F31 MH120920-01), AJ by a  
292 Canadian Open Neuroscience Platform Student Scholar Award (in partnership with Brain Canada).

### 2939 **Acknowledgments**

294 Compute resources provided by Compute Ontario and Compute Canada ([www.computecanada.ca](http://www.computecanada.ca))  
295 were used to perform this research.

### 296 **Data Availability Statement**

297 The datasets and code generated for this study can be found in the cnmfe-reviewer GitHub repository  
298 [<https://github.com/jf-lab/cnmfe-reviewer>].

299



### 300 Figures

301 **Figure 1. Interrater agreement of ROI labels.** A confusion matrix comparing the manually  
302 reviewed labels (include of exclude) for putative ROIs extracted from CNMF-E determined by two  
303 different raters. Each cell of the matrix is annotated with the proportion of ROIs.

304

305

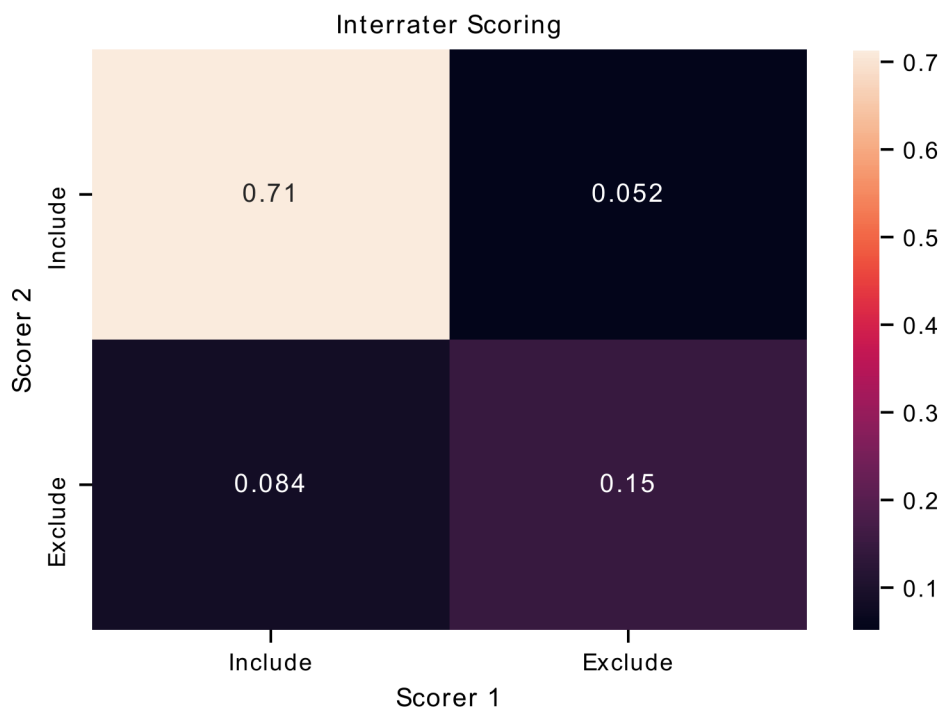

306 **Figure 2. F1 score performance with increasing training size.** Graph of the F1 test scores versus  
307 the number of training samples used to train the best models output by AutoSklearn (blue) and TPOT  
308 (green). (Inset) A graph of the same plot with a smaller range of training sizes and the change point is  
309 marked on each algorithm type.

310

311

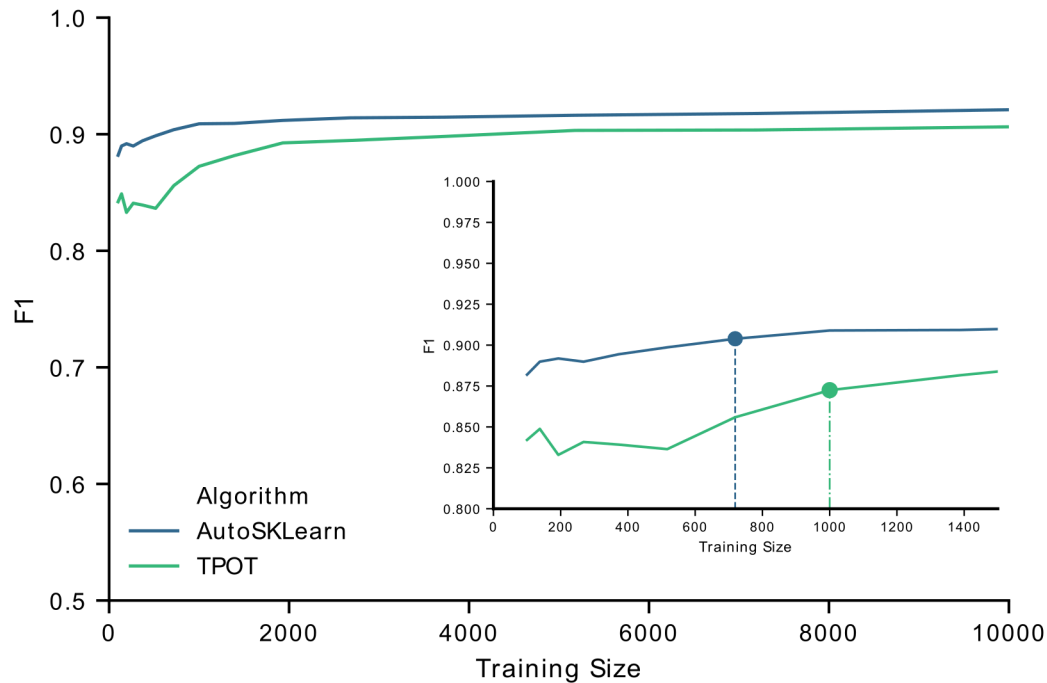

312 **Figure 3. Confusion matrices of AutoML tools: TPOT and AutoSklearn.** Each cell in the matrix  
313 is annotated with the proportion of ROIs labeled as Include or Exclude according to the predicted and  
314 true labels. Colors indicate the relative proportions of the labels where lower proportions are darker  
315 in color and higher proportions are lighter in color. The confusion matrices were made from  
316 predictions on the test set from the best models output by TPOT (left) and AutoSklearn (right).

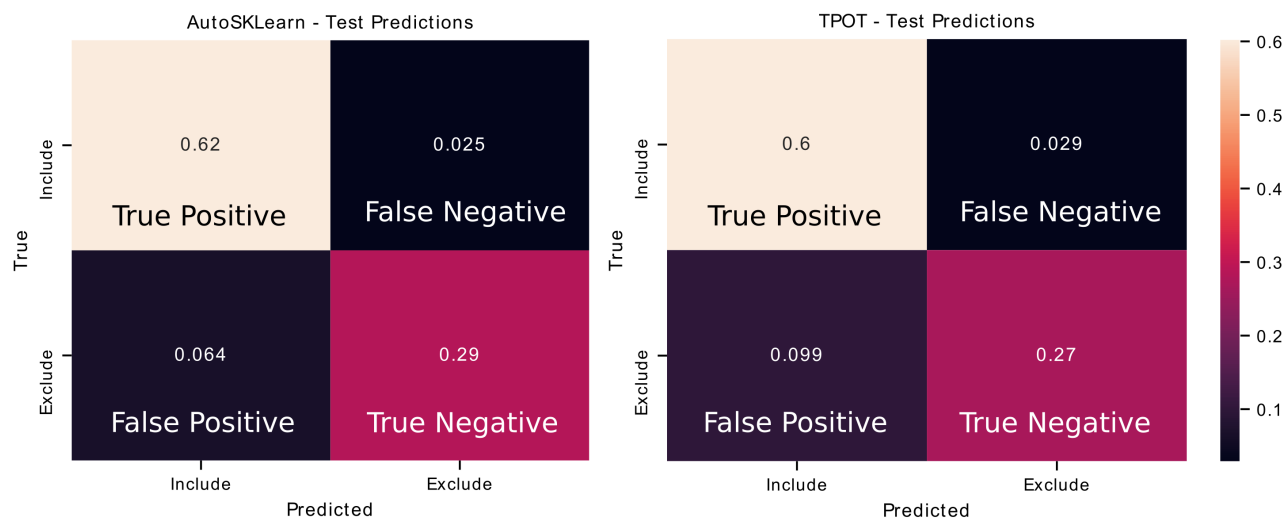

318

319 **Figure 4. Classifier confidence (TPOT) and class probabilities (AutoSklearn) on predicted false**  
320 **positives and false negatives.** Violin plots of the distribution of (A) TPOT classifier confidence or  
321 (B) AutoSklearn class probabilities on predicted ROI labels (Include or Exclude) in the test set. Each  
322 half of the violin plot is the distribution of values for labels that were correct (True, left/blue) or  
323 incorrect (False, right/green) based on the ground truth labels.

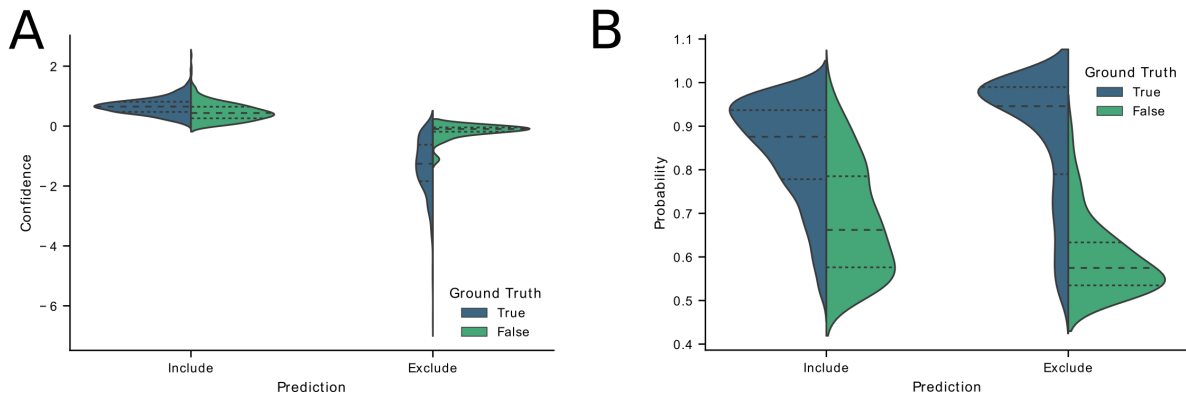

325

326 **Figure 5. Representative false positives and negatives compared to ground truth ROIs.** Example  
327 calcium traces (top) and spatial footprints (bottom) from ground truth ROIs labeled as Include (left)  
328 or Exclude (right). Example calcium traces (top) and spatial footprints (bottom) of false positive and  
329 false negative ROIs predicted from the AutoSklearn (middle row) or TPOT (bottom row) classifiers.

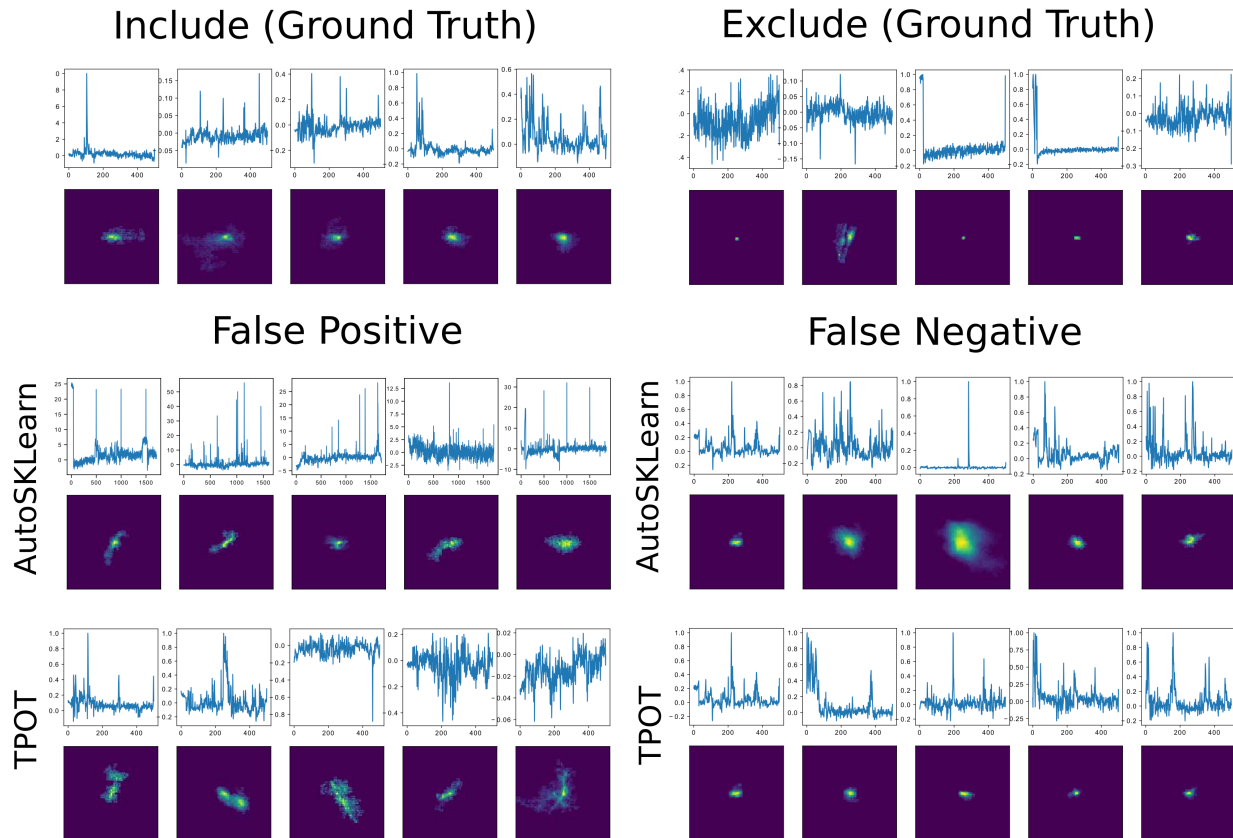



331 **Tables**

332 **Table 1. Mean F1 scores of AutoML methods on training cross-validation and final F1 scores**  
 333 **on the test set.**

334

|          | TPOT                      |       | AutoSklearn               |       |
|----------|---------------------------|-------|---------------------------|-------|
|          | Training CV (10-fold, 5x) | Test  | Training CV (10-fold, 5x) | Test  |
| F1 Score | 0.906                     | 0.904 | 0.917                     | 0.922 |

335

336 **Table 2. Cohen’s *d* of certainty scores between predicted labels that were correct or incorrect**  
 337 **compared to ground truth in TPOT or AutoSklearn.**

338

|                  | Include (Positive) |             | Exclude (Negative) |             |
|------------------|--------------------|-------------|--------------------|-------------|
|                  | TPOT               | AutoSklearn | TPOT               | AutoSklearn |
| Cohen’s <i>d</i> | 0.63               | 1.36        | 1.68               | 2.34        |

339
